# Supplementary material
Source: ML conference proceedings conference paper supplement (https://proceedings.mlr.press/v32/azar14.html)
Supplement: Supplementary file 3 [file azar14-supp.zip]

Archive with 3 entries (2 files):
- paper_supp.pdf
- __MACOSX/
- __MACOSX/._paper_supp.pdf
